# Supplementary material for: Clonal analysis by tunable CRISPR-mediated excision
Source: Oxford University Press journal article supplement (doi:10.1242/dev.170969), 2018-01-01
Supplement: dev170969supp.pdf [file dev170969supp.pdf]

**Figure S1. Functionality of the viral P2A peptide in *Tribolium castaneum***

Bicistronic expression of membrane-localized YFP (in green) and Histone2B-mCherry, mediated by the viral P2A peptide in blastoderm and early germband stage embryos of *Tribolium castaneum*. The two proteins are expressed from the same open reading frame, separated by the PTV1 peptide (Szymczak-Workman et al., 2012). The transgene was stably integrated in the genome. The distinct localization of membrane-YFP and Histone2B-mCherry proteins in the plasma membrane and chromatin, respectively, indicates that the P2A peptide is functional (mediates ribosomal skipping) in *Tribolium*.

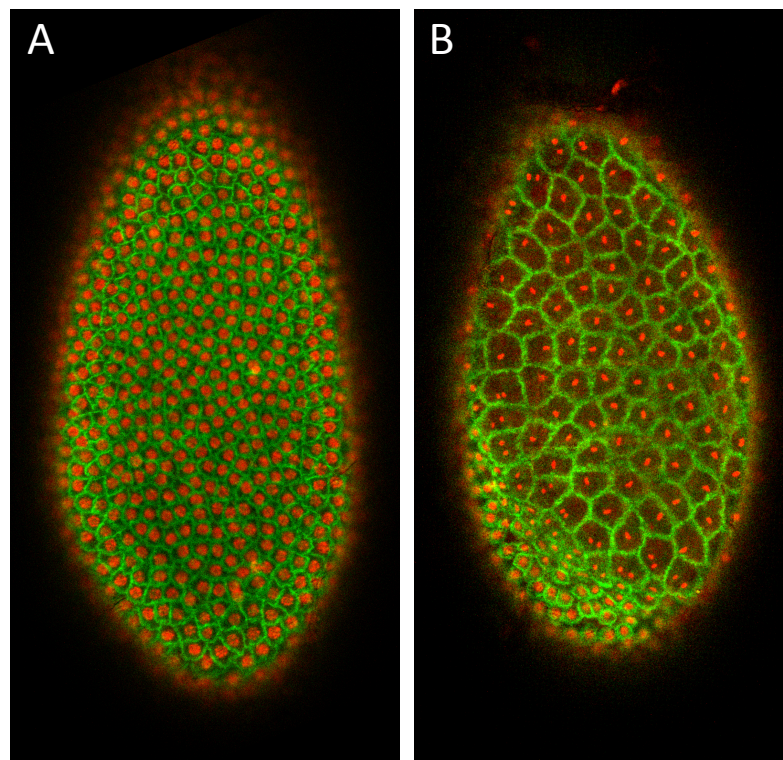

**Table S1. Frequency of marked cell clones.** The number of distinct clusters of H2B-mCherry-expressing cells was scored per embryo. We classified embryos in four categories: embryos with more than 10 clusters per embryo, 2-10 clusters, one cluster, or none. Each cluster was taken to represent a cell clone.

|                                                                                                           |        | >10 clones | 2-10 clones | 1 clone | no clones |
|-----------------------------------------------------------------------------------------------------------|--------|------------|-------------|---------|-----------|
| <b>A. Embryos with marked clones after 10 min heat shock at 46°C</b>                                      |        |            |             |         |           |
| <i>Valcyrie.LR #22</i>                                                                                    | (n=19) | 5%         | 68%         | 11%     | 16%       |
| <i>Valcyrie.LR #39*</i>                                                                                   | (n=15) | 60%        | 0%          | 0%      | 40%       |
| <i>Valcyrie.Uni #6</i>                                                                                    | (n=22) | 0%         | 5%          | 18%     | 77%       |
| <i>Valcyrie.Uni #11</i>                                                                                   | (n=17) | 0%         | 59%         | 12%     | 29%       |
| <b>B. Embryos with marked clones after 10 min heat shock at 44°C</b>                                      |        |            |             |         |           |
| <i>Valcyrie.LR #22</i>                                                                                    | (n=21) | 0%         | 10%         | 19%     | 71%       |
| <i>Valcyrie.LR #39*</i>                                                                                   | (n=11) | 9%         | 18%         | 9%      | 64%       |
| <i>Valcyrie.Uni #6</i>                                                                                    | (n=19) | 0%         | 0%          | 0%      | 100%      |
| <i>Valcyrie.Uni #11</i>                                                                                   | (n=20) | 0%         | 0%          | 10%     | 90%       |
| <b>C. Effect of post-heat-shock temperature (after 10 min heat shock at 46°C, <i>Valcyrie.LR #22</i>)</b> |        |            |             |         |           |
| 32°C                                                                                                      | (n=20) | 15%        | 40%         | 10%     | 35%       |
| 25°C                                                                                                      | (n=20) | 0%         | 25%         | 15%     | 60%       |

\* The *Valcyrie.LR #39* line is heterozygous, therefore approximately 50% of the embryos in these experiments did not carry the *Valcyrie.LR* construct.
